# Supplementary material for: Rheological, electrochemical, surface, DFT and molecular dynamics simulation studies on the anticorrosive properties of new epoxy monomer compound for steel in 1 M HCl solution
Source: Royal Society of Chemistry journal article supplement (doi:10.1039/c8ra09446b), 2019-01-01
Supplement: c8ra09446b1.pdf [file c8ra09446b1.pdf]

**Rheological, Electrochemical, Surface, DFT and Molecular Dynamics Simulation  
Studies on the Anticorrosive Properties of New Epoxy Monomer Compound for Steel in  
1 M HCl Solution**

**Omar Dagdag<sup>a</sup>, Ahmed El Harfi<sup>a</sup>, Omar Cherkaoui<sup>b</sup>, Zaki Safi<sup>c</sup>, Nuha Wazzan<sup>d</sup>, Lei**

**Guo<sup>e</sup>, E. D. Akpan<sup>f,g</sup>, Chandrabhan Verma<sup>f,g\*</sup>, E. E. Ebenso<sup>f,g\*</sup> and Ramzi T.T. Jalgham<sup>h</sup>**

<sup>a</sup>Laboratory of Aggroresources, Polymers and Process Engineering (LAPPE), Department of Chemistry, Faculty of Science, Ibn Tofail University, BP 133, 14000 Kenitra, Morocco.

<sup>b</sup>Higher School of Textile and Clothing Industries, Laboratory REMTEX, BP 7731, Oulfa, Casablanca, Morocco.

<sup>c</sup>Al Azhar University-Gaza, Chemistry Department, Faculty of Science, P.O Box 1277, Gaza, Palestine.

<sup>d</sup>King Abdulaziz University, Chemistry Department, Faculty of Science, P.O Box 42805, Jeddah, 21589, Saudi Arabia.

<sup>e</sup>School of Materials and Chemical Engineering, Tongren University, Tongren, 554300, China.

<sup>f</sup>Department of Chemistry, Faculty of Natural and Agricultural Sciences, School of Chemical and Physical Sciences, North-West University, Private Bag X2046, Mmabatho 2735, South Africa.

<sup>g</sup>Material Science Innovation & Modelling (MaSIM) Research Focus Area, Faculty of Natural and Agricultural Sciences, North-West University, Private Bag X2046, Mmabatho 2735, South Africa

<sup>h</sup>Department of Oil and Gas, Faculty of Engineering, Bani Walid University, Bani Walid, Libya.

## Supplementary Information

**ER:** Brown viscous resin;  $^1\text{H-NMR}$  (300 MHz,  $\text{CDCl}_3$ ):  $\delta\text{ppm}$ =2.38; 2.63 (dd, 2H,  $\text{CH}_2$ ) (A,B), 2.77; 3.16 (m, 1H, CH oxirane) (X), 3.46 (dd, 2H,  $-\text{N-CH}_2$ ) (C,D), 3.61 (dd, 2H,  $-\text{CO(N)-CH}_2$ ) (A,B), 6.94; 7.71 (s, 4H aromatic) (Ar); FTIR ( $\text{cm}^{-1}$ ): 3270 (residual hydroxyl and amine groups), 2978, 2883 (C-H vibrations), 1585, 1500, 1450 (1,2- substituted aromatic ring), 1654 (C=O amide), 1396, 1095, 1043 (C-O), 930, 880 (oxirane ring).

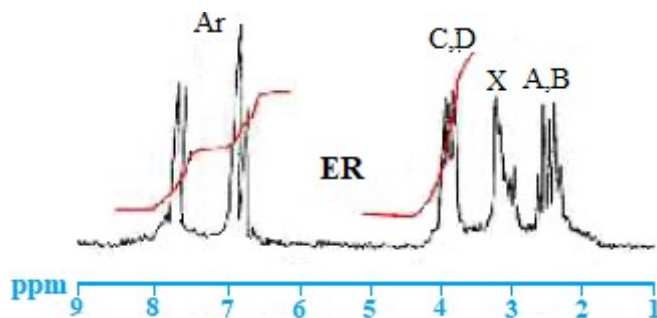

Fig SI 1  $^1\text{H}$  NMR spectra of ER.

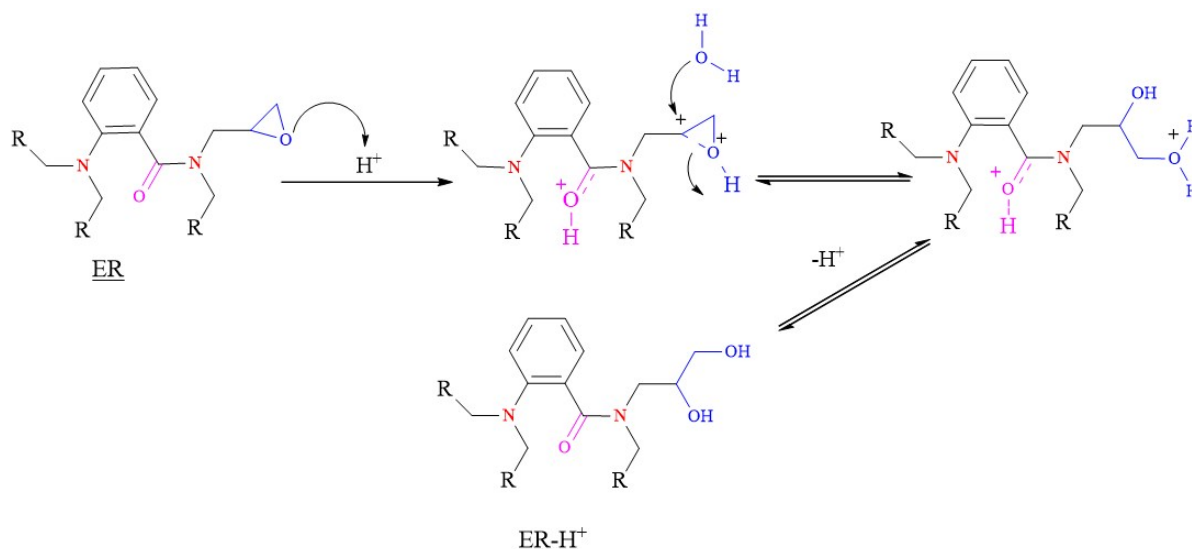

Fig. SI 2 Mechanism of ring opening reaction of epoxides of ER in acid solution.

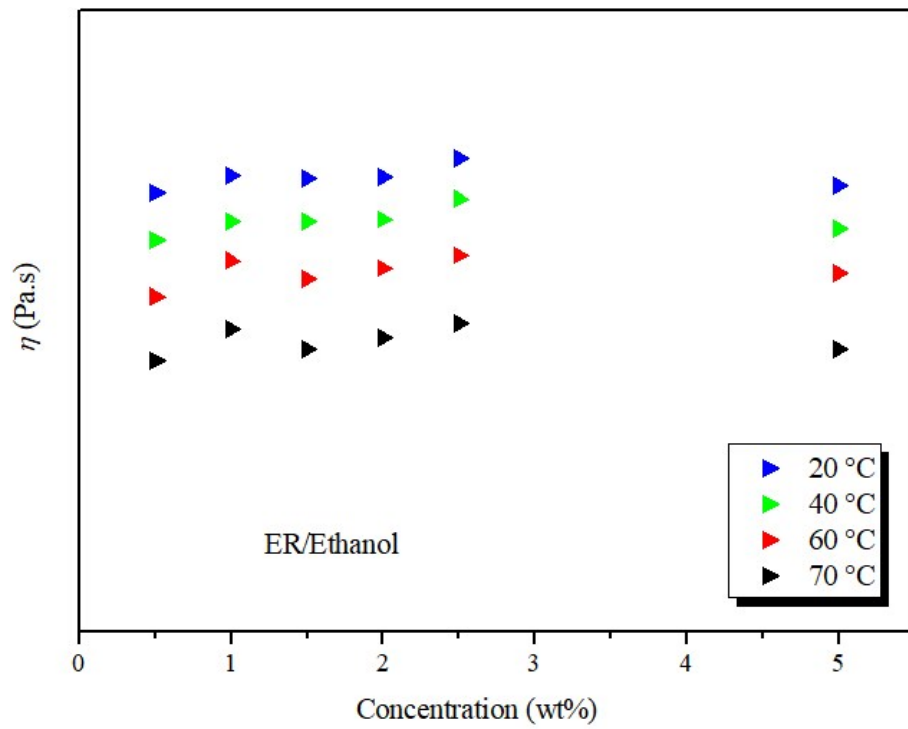

**Fig. SI 3** The consequences of concentration on viscosity of ER/Ethanol at: 20, 40, 60 and 70 °C.

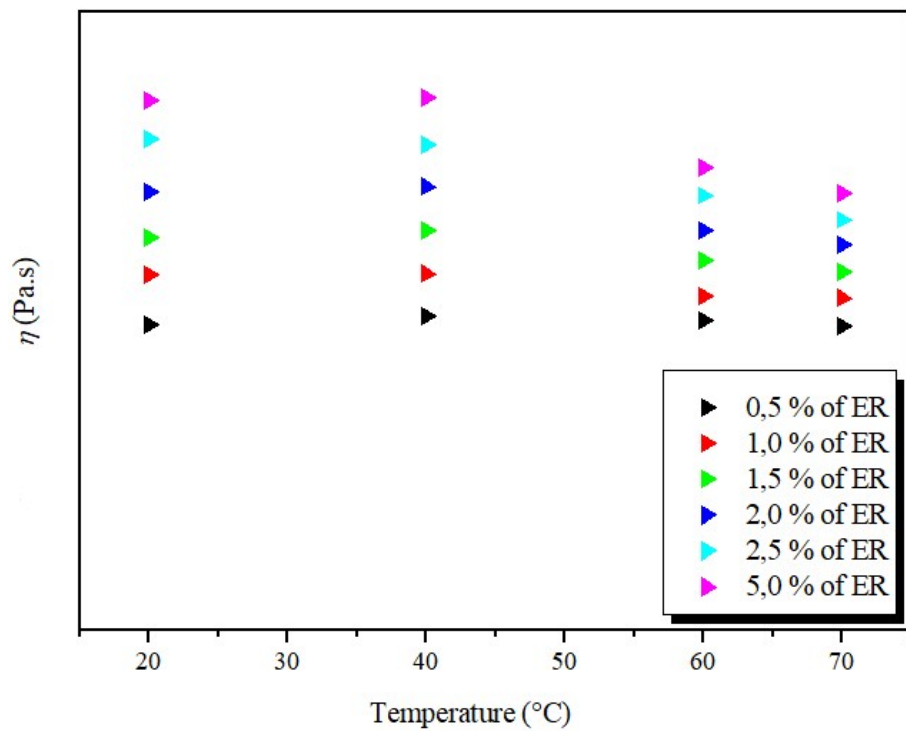

**Fig. SI 4** Viscosity as a function of temperature of ER/Ethanol at various concentrations

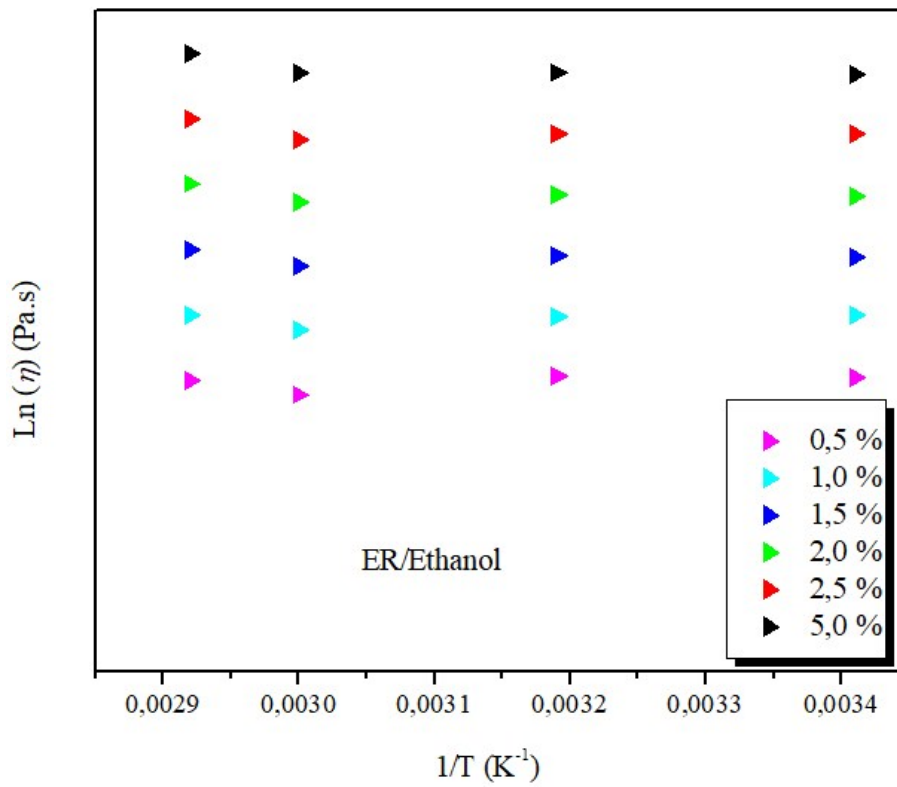

**Fig. SI 5** Arrhenius plots for the zero shear viscosity of concentrations of ER/Ethanol.

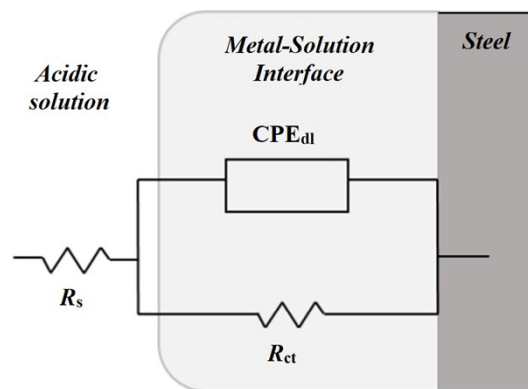

**Fig. SI 6** Equivalent circuit used for the analysis of the EIS data.

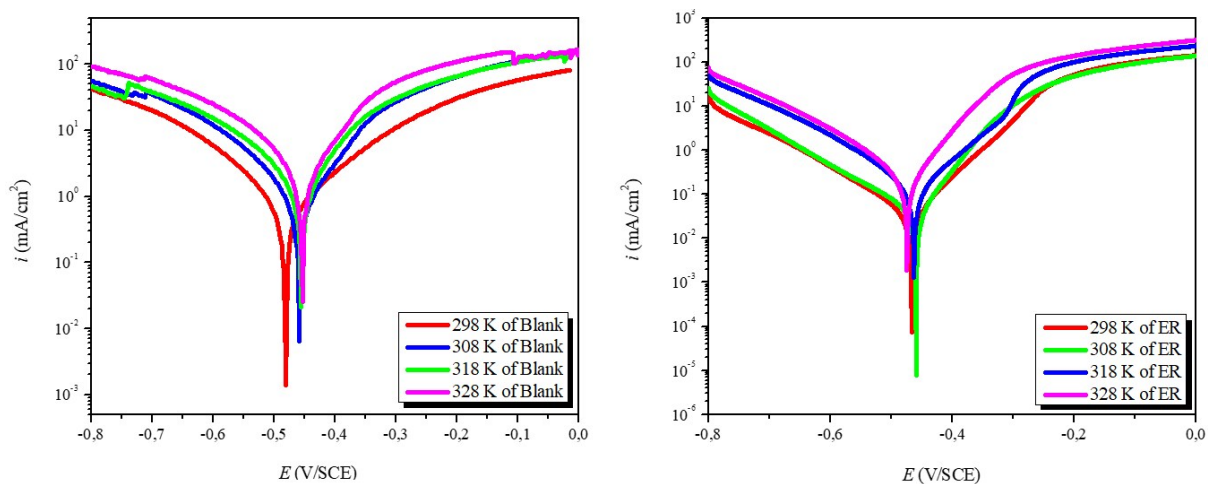

**Fig. SI 7** Potentiodynamic polarization plots of carbon steel in 1 M HCl solution without and in the presence of  $10^{-3}$  M of ER at varying temperatures.

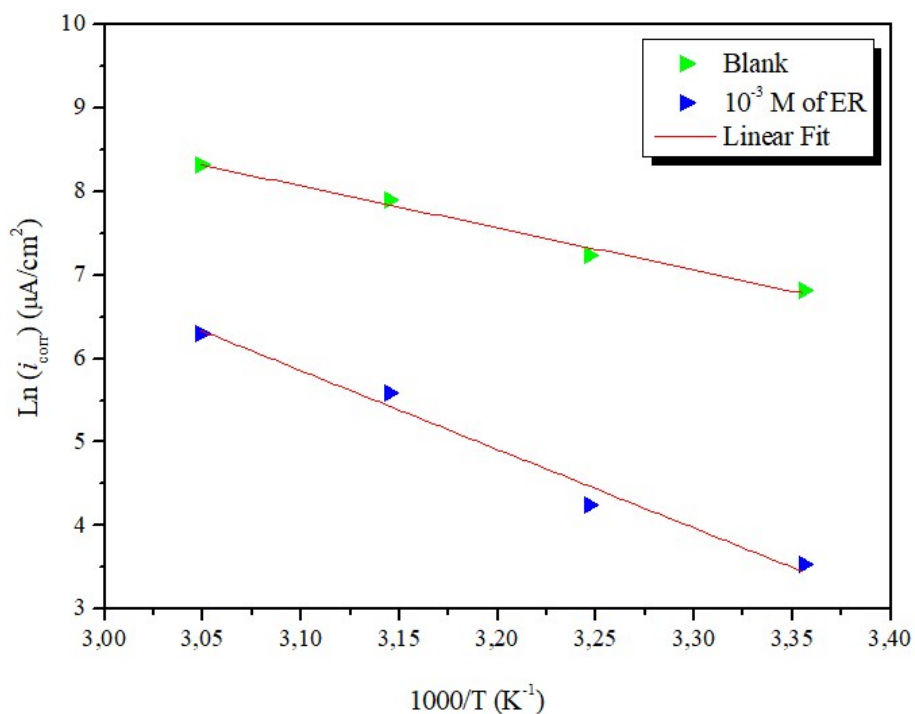

**Fig. SI 8** The relationship between  $\text{Ln}(i_{\text{corr}})$  and  $1/T$  for carbon steel in 1 M HCl solution without and in the presence of  $10^{-3}$  M concentration of ER.

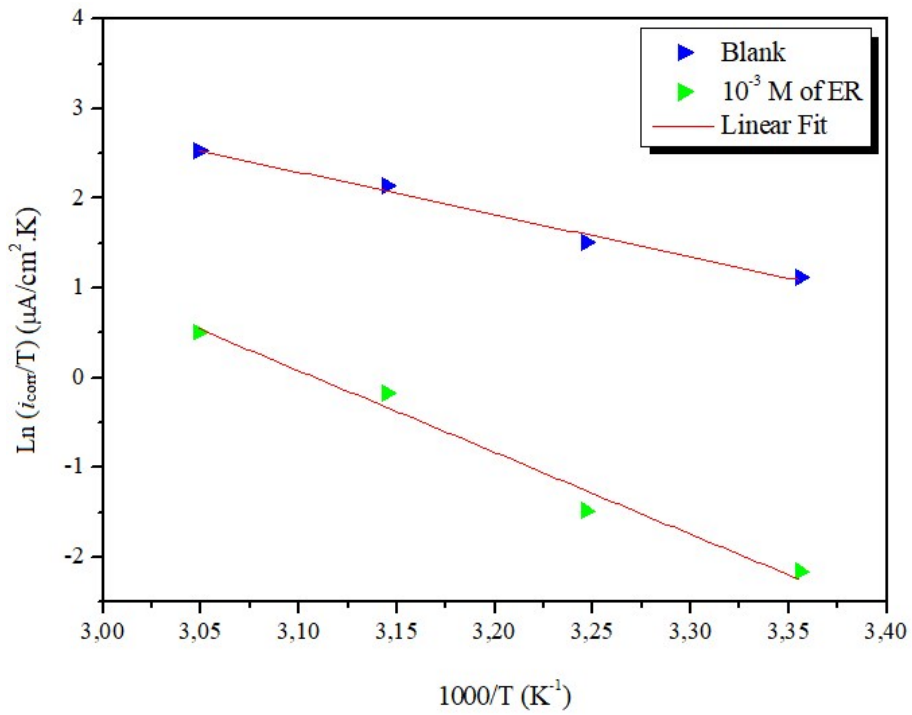

**Fig. SI 9** Transition state plots for carbon steel in 1 M HCl solution without and in the presence of  $10^{-3}$  M concentration of ER.

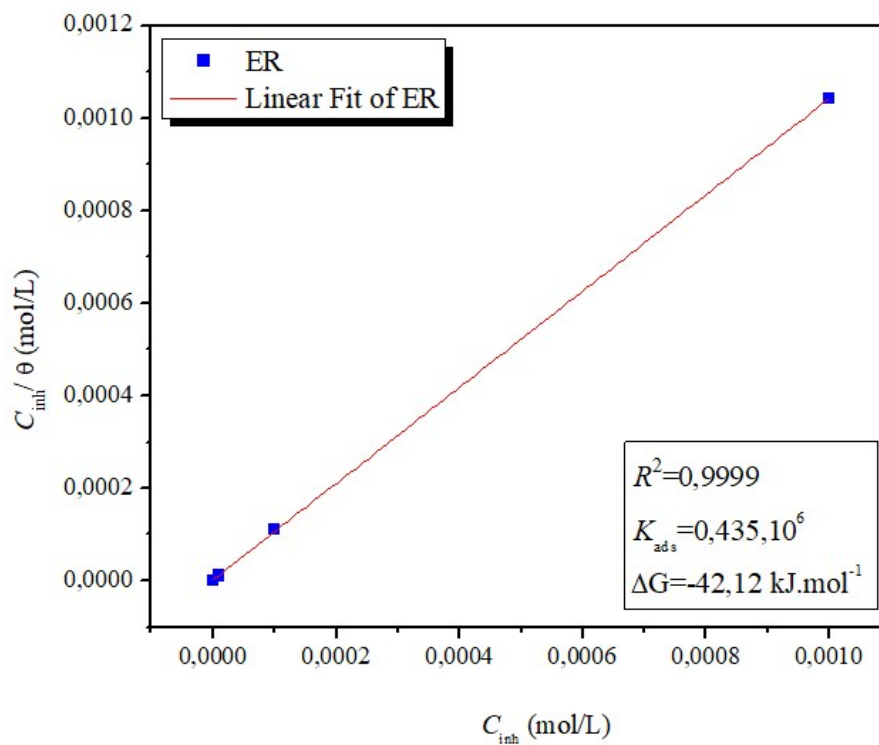

**Fig. SI 10.** Langmuir adsorption isotherm plot of ER on the carbon steel surface at 298 K.

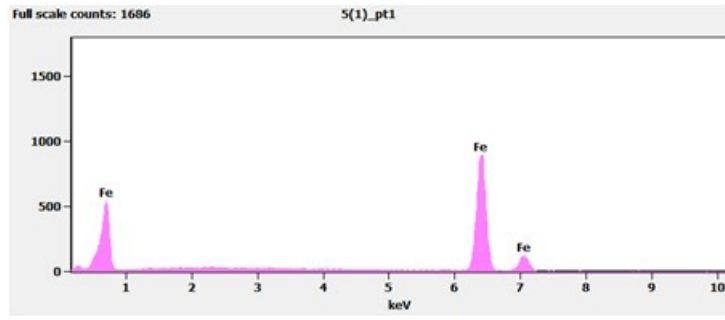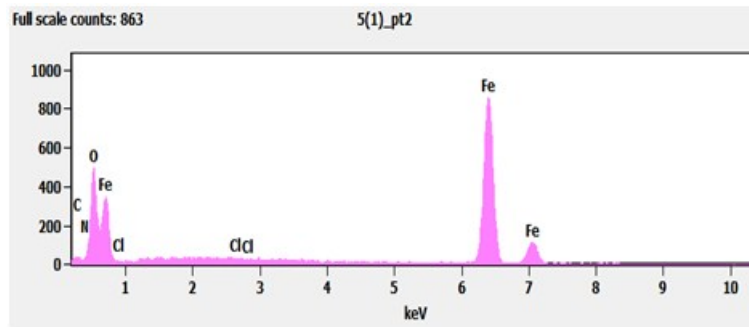

**Fig. SI 11.** EDX spectra of mild steel surface corroded in 1M HCl with and without ER.

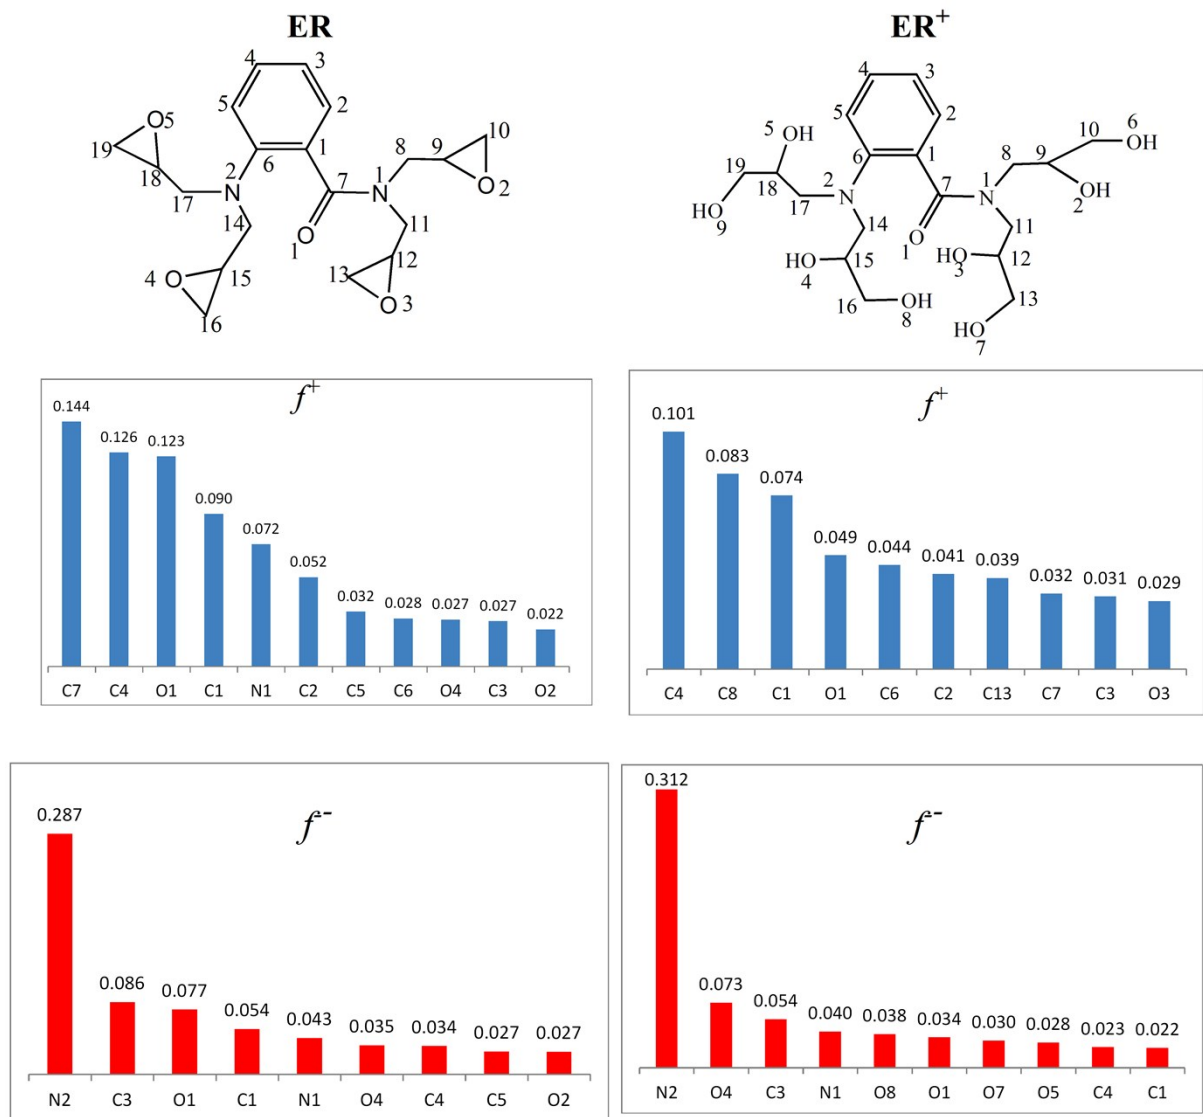

**Fig. SI 12.** Graphical presentation of the calculated Fukui indices of ER and its protonated form ER<sup>+</sup>.



**Table SI 1.** Composition of the carbon steel.

| C    | Mn   | Si   | Al   | Cr   | Mo   | Ni  | Cu   | Co     | V      | Fe      |
|------|------|------|------|------|------|-----|------|--------|--------|---------|
| 0.11 | 0.47 | 0.24 | 0.03 | 0.12 | 0.02 | 0.1 | 0.14 | <0.001 | <0.003 | Balance |

**Table SI 2** Name, abbreviation, chemical structure and analytical data of the synthesized compound.

| Inhibitor                             | Chemical structure | Analytical data                                                                                                                                                                                                                                                                                                                                                                                                                                                                                                              |
|---------------------------------------|--------------------|------------------------------------------------------------------------------------------------------------------------------------------------------------------------------------------------------------------------------------------------------------------------------------------------------------------------------------------------------------------------------------------------------------------------------------------------------------------------------------------------------------------------------|
| Tetraglycidyl-1,2-Aminobenzamide (ER) |                    | <b>ER:</b> Brown viscous resin, yield 92%; <sup>1</sup> H-NMR (DMSO-d <sub>6</sub> , 300 MHz): δppm=2.38; 2.63 (dd, 2H, CH <sub>2</sub> ), 2.77; 3.16 (m, 1H, CH oxirane), 3.21; 3.46 (dd, 2H, -N-CH <sub>2</sub> ), 3.21; 3.36: 3.61 (dd, 2H, -CO(N)-CH <sub>2</sub> ), 6.94; 7.71 (s, 4H aromatic); FTIR (cm <sup>-1</sup> ): 3270 (residual hydroxyl and amine groups), 2978, 2883 (C-H vibrations), 1585, 1500, 1450 (1,2-substituted aromatic ring), 1654 (C=O amide), 1396, 1095, 1043 (C-O), 930, 880 (oxirane ring). |

**Table SI 3:** The impact of temperature on the electrochemical parameters for carbon steel in

| T (K) | $E_{\text{corr}}$<br>mV/SCE |                   | $i_{\text{corr}}$<br>$\mu\text{A}/\text{Cm}^2$ |                   | $\eta\%$ | 1 M<br>HCl |
|-------|-----------------------------|-------------------|------------------------------------------------|-------------------|----------|------------|
|       | Blank                       | $10^{-3}$ M of ER | Blank                                          | $10^{-3}$ M of ER | -        | and        |
| 298   | - 473                       | -464              | 916                                            | 34.31             | 96       |            |
| 308   | - 459                       | -459              | 1390                                           | 69.70             | 95       | $10^{-3}$  |
| 318   | - 455                       | -462              | 2700                                           | 268.85            | 90       | M of       |
| 328   | - 453                       | -474              | 4100                                           | 546.82            | 87       | ER.        |

|                                | $E_a$ (kJ/mol) | $\Delta H_a$ (kJ/mol) | $\Delta S_a$ (J.mol <sup>-1</sup> K <sup>-1</sup> ) | SI |
|--------------------------------|----------------|-----------------------|-----------------------------------------------------|----|
| <b>Blank</b>                   | 41.94          | 39.30                 | - 56.70                                             |    |
| <b>10<sup>-3</sup> M of ER</b> | 78.40          | 75.90                 | 38.07                                               |    |

**4**Activation parameters for carbon steel in 1 M HCl solution without and in the presence of ER.

**Table SI 5**Calculated Quantum chemical parameters for epoxy compound and its protonated form obtained from DFT/B3LYB/6-311+G (d, p) in both gas phase and in solution.

|                      | Gas          |                 | Solution     |                 |
|----------------------|--------------|-----------------|--------------|-----------------|
|                      | ER           | ER <sup>+</sup> | ER           | ER <sup>+</sup> |
| <b>Energy (a.u.)</b> | -1224.236344 | -1530.223571    | -1224.258717 | -1530.253177    |
| $\mu^*$              | 3.731        | 3.949           | 5.660        | 3.698           |
| $E_{HOMO}$ (eV)      | -6.385       | -6.615          | -6.338       | -6.511          |
| $E_{LUMO}$ (eV)      | -0.968       | -1.208          | -0.881       | -1.060          |
| I                    | 6.385        | 6.615           | 6.338        | 6.511           |
| A                    | 0.968        | 1.208           | 0.881        | 1.060           |
| $\Delta E$           | 5.417        | 5.407           | 5.457        | 5.451           |
| $\chi$               | 3.676        | 3.912           | 3.609        | 3.785           |
| $\eta$               | 2.709        | 2.704           | 2.728        | 2.726           |
| $\sigma$             | 0.369        | 0.370           | 0.367        | 0.367           |
| $\omega$             | 2.709        | 2.704           | 2.728        | 2.726           |
| $\Delta N_{100}$     | 0.043        | 0.000           | 0.043        | 0.000           |
| $\Delta N_{110}$     | 0.211        | 0.168           | 0.211        | 0.168           |
| $\Delta N_{111}$     | 0.038        | -0.006          | 0.038        | -0.006          |
| $\Delta \psi$        | 1.020        | 0.882           | 1.054        | 0.948           |
| $\Delta E_{b-d}$     | -0.677       | -0.676          | -0.682       | -0.681          |
